# Supplementary material for: Fabrication of 3D Micro-Blades for the Cutting of Biological Structures in a Microfluidic Guillotine
Source: Preprints.org preprint supplement (doi:10.20944/preprints202107.0597.v1), 2021-07-27
Supplement: Supplementary file 1 [file supplementary]

## Supplementary Materials: Fabrication of 3D micro-blades for the cutting of biological structures in a microfluidic guillotine

Saisneha Koppaka, Kevin S. Zhang, Myra Kurosu Jalil, Lucas R. Blauch and Cindy K. Y. Tang

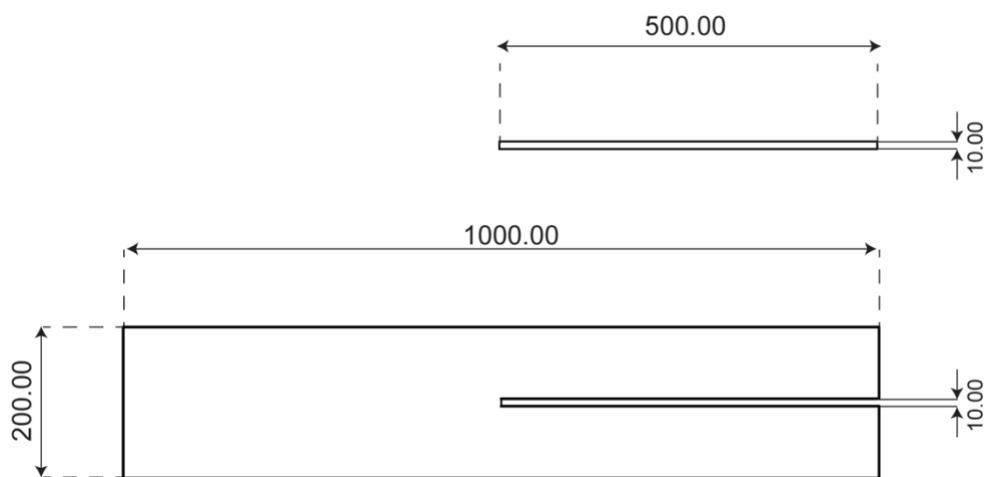

**Figure S1.** Schematic diagrams of the rectangular features for IP-S photoresist adhesion tests. Top view of rectangular features and the inverse of these features for the adhesion test in Table 1 (main text). Both features are 100  $\mu\text{m}$  tall. All dimensions are in units of microns.

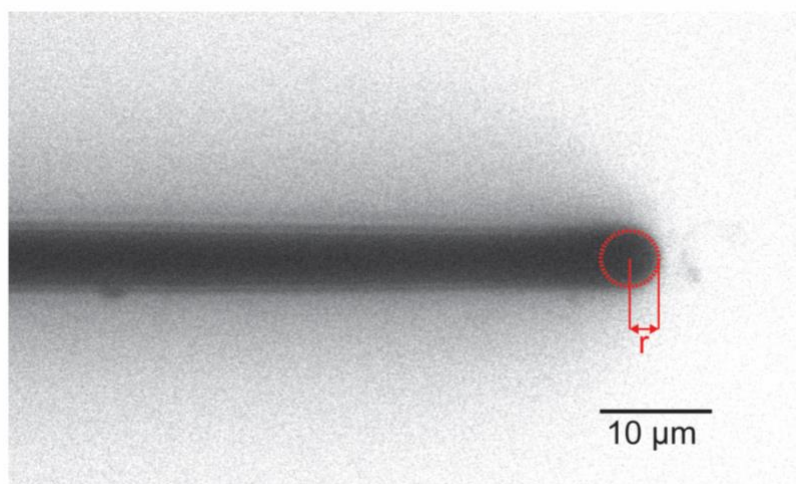

**Figure S2.** Radius of curvature of the tip of the 90° blade. Confocal microscope image of the 90° blade in PDMS used for measuring blade tip radius. See section 2.4 in the text for details.

**Table S1.** Table of Bonferroni corrected p-values of Sytox fluorescence data. Significance is denoted with \* indicating  $p \leq 0.05$ , \*\* indicating  $p \leq 0.01$ , and \*\*\* indicating  $p \leq 0.001$ .

|               | 90° | 11°    | Catenary | Sashimi | Dull to Sharp |
|---------------|-----|--------|----------|---------|---------------|
| 90°           |     | 0.041* | 0.007**  | 1.000   | 0.340         |
| 11°           |     |        | 1.000    | 0.797   | 0.008**       |
| Catenary      |     |        |          | 0.669   | 0.0005***     |
| Sashimi       |     |        |          |         | 0.038*        |
| Dull to Sharp |     |        |          |         |               |
